# Supplementary material for: Respiratory viral infection promotes the awakening and outgrowth of dormant metastatic breast cancer cells in lungs
Source: Research Square preprint supplement (doi:10.21203/rs.3.rs-4210090/v1), 2024-04-05
Supplement: Supplementary file 1 [file d60c675081436502a5b2f461.xlsx]

## Sheet: Table Index
eTable 1	List of differentially expressed genes with an adjusted P value < 0.05 from the Her2+IAV vs WT+IAV comparison at 15dpi in CD4+ Effector T cells
eTable 2	List of differentially expressed genes with an adjusted P value < 0.05 from the Her2+IAV vs WT+IAV comparison at 15dpi in CD4+Il7r+ T cells

## Sheet: eTable 1
Table 1: List of differentially expressed genes with an adjusted P value < 0.05 from the Her2+IAV vs WT+IAV comparison at 15dpi in CD4+ Effector T cells
Wilcoxon Rank Sum test was run to test for differential expression between the sample groups
Adjusted P value was calculated based on bonferroni correction using all genes tested
avg_log2FC refers to the log2 fold-change of the average expression between the two groups. Positive values indicate that the gene is more highly expressed in the Her2+IAV+15dpi sample
pct.1 refers to the percentage of cells where the gene is detected in Her2+IAV+15dpi sample
pct.2 refers to the percentage of cells where the gene is detected in WT+IAV+15dpi sample
Gene	pvalue	avg_log2FC	pct.1	pct.2	adjusted p
mt-Co3	8.02e-98	-2.15767	0.216	0.612	1.3e-93
Col1a1	8.09e-91	-3.16189	0.048	0.346	1.31e-86
mt-Co2	1.89e-89	-1.74044	0.445	0.764	3.07e-85
Tnfaip3	5.25e-88	2.12882	0.663	0.269	8.51e-84
Cd52	1.41e-83	-1.05889	0.859	0.951	2.28e-79
Mgp	5.85e-83	-2.651	0.073	0.379	9.48e-79
Tmsb4x	5.04e-79	-0.556118	0.999	1	8.17e-75
mt-Atp6	3.76e-76	-1.86485	0.243	0.593	6.1e-72
Zfp36l2	3.87e-68	1.21197	0.895	0.701	6.28e-64
B2m	7.22e-62	-0.776758	0.837	0.92	1.17e-57
mt-Nd1	1.71e-59	-2.14532	0.164	0.445	2.77e-55
Ly6a	1.62e-53	-1.07506	0.549	0.812	2.62e-49
Trac	3.09e-48	-0.816685	0.834	0.915	5.01e-44
mt-Co1	1.16e-46	-1.39856	0.346	0.618	1.88e-42
Dynll1	1.24e-46	-1.83495	0.128	0.366	2.01e-42
mt-Atp8	1.44e-45	-1.25939	0.407	0.655	2.33e-41
Dusp1	2.14e-45	1.83234	0.556	0.278	3.48e-41
Sparc	8.37e-44	-2.10076	0.07	0.272	1.36e-39
Klf6	9.04e-43	1.44202	0.643	0.4	1.46e-38
Fn1	5.75e-42	-2.47922	0.045	0.217	9.32e-38
Id2	1.03e-41	-1.06526	0.704	0.837	1.66e-37
Eef2	1.23e-41	1.06614	0.692	0.467	2e-37
Igkc	5.34e-41	-1.05699	0.454	0.717	8.65e-37
Srsf5	1.23e-39	1.23746	0.601	0.358	1.99e-35
S100a11	1.44e-39	-0.868946	0.634	0.802	2.34e-35
Slfn2	2.8e-39	-0.904719	0.556	0.759	4.53e-35
Dusp5	3.56e-38	1.51679	0.596	0.373	5.77e-34
Pdcd4	4.21e-38	1.04381	0.705	0.497	6.82e-34
Rsrp1	1.18e-35	1.02446	0.647	0.417	1.91e-31
Gadd45b	2.49e-35	-1.4336	0.211	0.441	4.03e-31
Tnf	3.44e-35	-1.66133	0.141	0.348	5.57e-31
Ifitm3	1.66e-33	-2.63852	0.031	0.164	2.69e-29
Lgals1	1.09e-32	-1.42242	0.136	0.339	1.77e-28
Ets1	2.58e-32	0.537312	0.963	0.932	4.19e-28
Vps37b	8.51e-32	1.47502	0.445	0.213	1.38e-27
S100a4	1.33e-31	-0.893633	0.552	0.752	2.15e-27
mt-Cytb	1.97e-31	-1.44684	0.182	0.388	3.2e-27
Arhgef1	2.23e-31	0.571219	0.898	0.822	3.62e-27
Sumo2	8.48e-31	-1.83669	0.092	0.261	1.38e-26
Gimap3	2.5e-29	0.705328	0.805	0.634	4.05e-25
Itpkb	2.91e-29	1.20611	0.51	0.294	4.72e-25
Col1a2	6.81e-29	-2.40114	0.027	0.143	1.1e-24
Fxyd5	1.86e-28	-0.725064	0.688	0.801	3.02e-24
Limd2	4.99e-28	-0.724257	0.619	0.765	8.08e-24
Sh3bgrl3	1.1e-27	-0.636384	0.66	0.82	1.78e-23
mt-Nd3	1.15e-26	-2.45688	0.035	0.151	1.86e-22
Cxcr4	4.26e-26	1.45162	0.338	0.138	6.9e-22
Cirbp	1.63e-25	1.21237	0.445	0.245	2.64e-21
Zc3hav1	2.78e-25	0.875641	0.606	0.419	4.5e-21
H2-K1	6.45e-24	0.478271	0.907	0.85	1.05e-19
Tsc22d3	6.8e-24	1.60558	0.359	0.175	1.1e-19
Ctla4	1.25e-23	0.695296	0.546	0.339	2.02e-19
Fos	2.62e-23	1.72552	0.351	0.159	4.25e-19
Col3a1	3.4e-23	-1.78505	0.041	0.155	5.5e-19
Arpc4	6.92e-23	-1.11009	0.161	0.333	1.12e-18
Kif21b	9.87e-23	0.811373	0.638	0.469	1.6e-18
Ifitm2	1.23e-22	-2.05445	0.064	0.19	2e-18
Ifi27l2a	1.81e-22	-1.04717	0.395	0.576	2.93e-18
mt-Nd4l	2.94e-22	-1.37925	0.132	0.29	4.77e-18
Gpr171	1.37e-21	-1.36924	0.12	0.269	2.22e-17
Thy1	3.13e-21	-0.577254	0.768	0.849	5.08e-17
Eef1a1	3.39e-21	-0.332493	0.992	0.988	5.5e-17
Arpc2	3.56e-21	-0.867358	0.333	0.508	5.76e-17
Ifi47	5.42e-21	-0.778421	0.362	0.55	8.79e-17
Jmy	8.29e-21	2.11713	0.206	0.059	1.34e-16
Tab2	1.55e-20	-0.87721	0.293	0.478	2.51e-16
Hmgb1	3.09e-20	1.30654	0.323	0.15	5.01e-16
Clec2d	4.02e-20	-0.577351	0.619	0.787	6.52e-16
Tpt1	6.71e-20	-0.357841	0.983	0.97	1.09e-15
Gimap1	8.03e-20	0.770735	0.616	0.474	1.3e-15
Selplg	1.78e-19	-0.606053	0.615	0.752	2.89e-15
Hexim1	2.63e-19	-1.06009	0.228	0.394	4.27e-15
Cnn2	3.09e-19	-0.451587	0.771	0.861	5e-15
Crebzf	4.12e-19	1.51551	0.26	0.104	6.67e-15
Ptpn7	4.49e-19	-0.900572	0.329	0.495	7.29e-15
Fam107b	6.68e-19	0.605424	0.74	0.623	1.08e-14
mt-Nd4	7.38e-19	-1.62649	0.062	0.173	1.2e-14
Lcp1	7.88e-19	-0.398165	0.881	0.924	1.28e-14
Elmo1	8.45e-19	-0.656949	0.496	0.654	1.37e-14
Hnrnpul1	1.13e-18	0.591724	0.707	0.592	1.83e-14
S1pr4	1.23e-18	0.814034	0.618	0.463	2e-14
Isg20	1.26e-18	-1.16916	0.162	0.312	2.05e-14
Arhgef18	2.67e-18	0.778527	0.564	0.392	4.33e-14
Tubb4b	4.48e-18	-1.02472	0.231	0.39	7.26e-14
Bcl3	6.34e-18	-1.1012	0.173	0.325	1.03e-13
Parp14	6.92e-18	-1.04249	0.193	0.352	1.12e-13
Crlf3	1.03e-17	0.897566	0.536	0.385	1.68e-13
mt-Nd5	1.06e-17	-1.23134	0.16	0.302	1.71e-13
Isg15	1.17e-17	-2.02726	0.047	0.144	1.9e-13
Mcl1	1.84e-17	0.525745	0.784	0.673	2.98e-13
B4galnt1	3.18e-17	0.743532	0.548	0.386	5.16e-13
Bgn	3.56e-17	-1.63509	0.067	0.175	5.78e-13
Pim1	3.88e-17	0.901138	0.594	0.461	6.29e-13
Znrf2	3.98e-17	0.727987	0.576	0.434	6.46e-13
Sirt7	4.78e-17	1.00838	0.37	0.211	7.74e-13
Cnbp	5.14e-17	1.19735	0.34	0.188	8.33e-13
Glipr1	8.43e-17	-1.16434	0.119	0.249	1.37e-12
Slfn1	9.52e-17	-1.20475	0.155	0.291	1.54e-12
Arhgdib	2.08e-16	-0.361461	0.903	0.925	3.37e-12
Rtp4	2.79e-16	-1.60524	0.067	0.171	4.52e-12
Naca	3.54e-16	-0.724387	0.376	0.537	5.73e-12
Elob	3.73e-16	-0.691846	0.403	0.566	6.05e-12
Ms4a6b	3.99e-16	-0.513575	0.634	0.769	6.47e-12
Rnf187	4.37e-16	0.645403	0.611	0.469	7.08e-12
Nr4a1	7.48e-16	1.04149	0.244	0.101	1.21e-11
Ccr5	1.1e-15	-1.20013	0.155	0.289	1.78e-11
Vasp	1.23e-15	-0.476007	0.753	0.84	1.99e-11
Eif3h	1.39e-15	-0.837504	0.271	0.428	2.26e-11
Brd2	1.73e-15	-0.748845	0.316	0.47	2.81e-11
Eif3f	2.21e-15	-0.699706	0.389	0.533	3.59e-11
Hspa1b	2.33e-15	2.20331	0.183	0.064	3.78e-11
Tnfsf10	2.62e-15	-1.09856	0.127	0.252	4.25e-11
Tagap	5.36e-15	1.12959	0.386	0.239	8.68e-11
Top2b	9.81e-15	0.893293	0.383	0.236	1.59e-10
Pkm	1.01e-14	-0.859526	0.355	0.49	1.64e-10
Pdcd1	1.03e-14	-0.919345	0.235	0.375	1.67e-10
Lat	1.25e-14	0.468024	0.838	0.766	2.02e-10
Cd3g	1.25e-14	-0.433628	0.844	0.891	2.03e-10
Anp32a	1.52e-14	0.585189	0.653	0.53	2.47e-10
Atp5j	2.27e-14	-1.03646	0.138	0.261	3.68e-10
Tspo	2.32e-14	0.676036	0.581	0.448	3.75e-10
Jpt1	2.89e-14	0.604311	0.611	0.48	4.69e-10
Arpc3	3.58e-14	-0.725718	0.285	0.437	5.8e-10
Glrx	3.67e-14	-0.815671	0.358	0.491	5.95e-10
Klf2	3.74e-14	1.06529	0.433	0.289	6.07e-10
Arglu1	4.26e-14	0.734264	0.415	0.257	6.9e-10
Per1	4.94e-14	0.95995	0.378	0.236	8e-10
Arhgap45	5.56e-14	0.39224	0.843	0.761	9.01e-10
Sh3glb1	6.39e-14	-0.640344	0.359	0.501	1.04e-09
Fau	7.76e-14	0.324348	0.918	0.853	1.26e-09
Slc25a5	7.95e-14	-1.10978	0.129	0.244	1.29e-09
Tmem123	9.09e-14	-0.822586	0.261	0.4	1.47e-09
Bcl11b	1.09e-13	0.583133	0.597	0.469	1.77e-09
Mbnl1	1.12e-13	0.498881	0.747	0.636	1.82e-09
Batf	1.3e-13	-0.825002	0.225	0.365	2.1e-09
Itk	1.3e-13	0.470419	0.748	0.665	2.11e-09
Sfr1	2.04e-13	-0.84161	0.215	0.348	3.31e-09
Tmsb10	2.23e-13	-0.433292	0.86	0.909	3.62e-09
Tmem167	2.93e-13	-0.924488	0.174	0.302	4.75e-09
H2-D1	3.89e-13	0.410529	0.799	0.726	6.31e-09
Leng8	4.17e-13	0.697313	0.48	0.336	6.76e-09
Ywhah	4.28e-13	-0.743828	0.273	0.413	6.94e-09
Spp1	4.89e-13	-1.32113	0.076	0.171	7.92e-09
Cox7b	5.61e-13	-0.777168	0.298	0.429	9.1e-09
Vps54	9.99e-13	-0.672755	0.433	0.568	1.62e-08
AA467197	1.19e-12	-1.47739	0.049	0.13	1.93e-08
Rgs1	1.23e-12	0.669677	0.601	0.472	2e-08
Junb	1.38e-12	0.616706	0.754	0.68	2.24e-08
Cass4	1.47e-12	-1.17191	0.092	0.192	2.38e-08
Suz12	2.22e-12	-0.894076	0.176	0.297	3.6e-08
Cpt1a	2.36e-12	1.4303	0.194	0.084	3.83e-08
Lamp2	2.69e-12	-1.04231	0.117	0.223	4.37e-08
Ahnak	2.78e-12	0.514471	0.791	0.764	4.51e-08
Ccdc88c	2.88e-12	0.752606	0.399	0.264	4.67e-08
Eif4b	3.11e-12	0.775073	0.451	0.329	5.04e-08
Actr3	3.19e-12	-0.603074	0.364	0.497	5.18e-08
Cdkn1b	3.81e-12	0.570977	0.563	0.433	6.18e-08
Kdm6b	4.01e-12	1.07735	0.305	0.177	6.49e-08
Aida	4.14e-12	-1.25815	0.072	0.161	6.71e-08
Dnajb1	4.54e-12	0.984854	0.358	0.234	7.36e-08
Cd82	4.81e-12	-0.493118	0.777	0.835	7.8e-08
Cox6b1	4.94e-12	0.931448	0.315	0.189	8e-08
Cdc42se1	4.96e-12	0.589514	0.539	0.411	8.04e-08
Mthfd2	4.96e-12	-0.936581	0.102	0.206	8.04e-08
Esyt2	5.51e-12	0.614828	0.508	0.37	8.93e-08
Phf11b	6.02e-12	-1.16585	0.088	0.182	9.76e-08
Pnrc1	6.83e-12	0.447034	0.668	0.555	1.11e-07
Wac	7.2e-12	-0.811988	0.171	0.29	1.17e-07
Chd3	7.22e-12	0.595268	0.484	0.34	1.17e-07
Dgka	7.38e-12	0.508423	0.699	0.6	1.2e-07
Dnaja1	8.6e-12	0.938666	0.374	0.255	1.39e-07
Phf1	9.04e-12	0.946557	0.329	0.21	1.47e-07
Tram1	1.06e-11	-0.551245	0.413	0.547	1.71e-07
Irgm2	1.1e-11	-1.20348	0.093	0.189	1.78e-07
Sertad1	1.22e-11	-0.854904	0.137	0.247	1.97e-07
Ube2v2	1.74e-11	-1.31062	0.058	0.136	2.82e-07
Stim1	1.93e-11	0.872155	0.307	0.178	3.13e-07
Atp2b1	2.69e-11	0.786052	0.368	0.244	4.36e-07
Csrnp1	2.99e-11	1.52353	0.153	0.059	4.85e-07
Gbp4	3.3e-11	-0.783123	0.247	0.374	5.35e-07
Stk4	3.72e-11	0.998611	0.285	0.171	6.02e-07
Heca	4.28e-11	0.655134	0.471	0.341	6.95e-07
Gpr68	4.51e-11	-0.6373	0.324	0.461	7.31e-07
Chchd2	5.18e-11	0.584057	0.562	0.442	8.39e-07
Zmiz1	5.25e-11	-0.807683	0.197	0.315	8.51e-07
Mast3	6.16e-11	0.826833	0.379	0.262	9.98e-07
Eif4a2	6.6e-11	0.493522	0.644	0.539	1.07e-06
Vezf1	7.29e-11	-0.944171	0.136	0.239	1.18e-06
Ppp1r15a	7.72e-11	0.950928	0.339	0.219	1.25e-06
Capza1	8.09e-11	-0.614033	0.276	0.407	1.31e-06
Nedd9	8.23e-11	-0.724554	0.3	0.419	1.33e-06
Myh9	9.61e-11	0.559237	0.599	0.486	1.56e-06
Prkch	1e-10	-0.660339	0.337	0.459	1.63e-06
Irf9	1.01e-10	-0.857076	0.143	0.248	1.64e-06
Actr2	1.18e-10	-0.67319	0.285	0.408	1.91e-06
Phf20l1	1.24e-10	0.766106	0.352	0.228	2.01e-06
Tnfrsf4	1.44e-10	-1.17578	0.154	0.255	2.33e-06
Smap2	1.45e-10	0.586981	0.558	0.448	2.36e-06
Sec61a1	1.47e-10	-0.872729	0.139	0.241	2.39e-06
Sars	1.49e-10	1.27065	0.209	0.108	2.41e-06
Rfx1	1.63e-10	0.946469	0.33	0.213	2.64e-06
Gbp5	1.67e-10	-1.14346	0.082	0.168	2.71e-06
Ifrd1	1.68e-10	1.25994	0.233	0.127	2.73e-06
Sntb1	1.78e-10	0.881111	0.269	0.151	2.89e-06
Peli1	2.3e-10	0.604474	0.538	0.432	3.73e-06
Ddit4	2.3e-10	-0.583034	0.185	0.302	3.73e-06
H13	2.42e-10	-0.643196	0.252	0.377	3.93e-06
Kdm3b	2.56e-10	0.749606	0.389	0.27	4.16e-06
Slfn8	2.59e-10	-0.823384	0.191	0.303	4.2e-06
Ablim1	2.85e-10	-0.48004	0.527	0.636	4.63e-06
Il2rb	2.94e-10	-0.375923	0.669	0.756	4.77e-06
Prkd2	3.12e-10	0.743146	0.417	0.293	5.06e-06
Klk8	3.13e-10	-1.14536	0.108	0.197	5.08e-06
Itga4	3.25e-10	0.708475	0.447	0.336	5.27e-06
Lfng	3.37e-10	-0.438302	0.564	0.68	5.47e-06
Gabbr1	3.46e-10	1.31725	0.205	0.106	5.62e-06
Ech1	3.69e-10	-0.77647	0.234	0.341	5.99e-06
Fgl2	3.82e-10	-0.675558	0.317	0.445	6.2e-06
Utrn	4.02e-10	0.888873	0.309	0.19	6.52e-06
Wnk1	4.53e-10	-0.495623	0.48	0.592	7.35e-06
Zc3h12a	4.69e-10	0.853911	0.304	0.186	7.6e-06
Pten	5.65e-10	-0.660176	0.285	0.403	9.16e-06
Rrbp1	6.11e-10	-0.88436	0.156	0.257	9.9e-06
Igtp	6.73e-10	-0.852138	0.166	0.27	1.09e-05
Erp44	7.05e-10	-0.964205	0.114	0.206	1.14e-05
Cd48	7.12e-10	-0.72707	0.244	0.36	1.15e-05
Kmt2e	7.35e-10	-0.595495	0.293	0.415	1.19e-05
Igfbp7	7.44e-10	-1.29306	0.045	0.11	1.21e-05
Klf3	8.22e-10	0.8374	0.251	0.142	1.33e-05
Ccdc9	8.94e-10	0.911492	0.268	0.16	1.45e-05
Cfl1	9.17e-10	-0.279497	0.912	0.938	1.49e-05
Ubc	1.1e-09	0.377058	0.719	0.618	1.78e-05
Ctla2a	1.15e-09	-0.500686	0.376	0.507	1.87e-05
P2ry10	1.22e-09	0.69772	0.338	0.223	1.98e-05
Rap1b	1.42e-09	-0.407815	0.671	0.74	2.3e-05
Tma7	1.58e-09	-0.460325	0.305	0.429	2.56e-05
Ramp1	1.63e-09	-0.673419	0.239	0.353	2.64e-05
Psenen	1.71e-09	-0.476956	0.409	0.528	2.77e-05
Reep5	1.84e-09	-0.566417	0.332	0.451	2.98e-05
Ankrd11	2.06e-09	0.562846	0.479	0.364	3.34e-05
Map2k3	2.21e-09	-0.822191	0.18	0.283	3.59e-05
Plec	2.22e-09	0.666876	0.535	0.449	3.61e-05
Nabp1	2.25e-09	-0.677	0.247	0.364	3.64e-05
Gpr183	2.32e-09	0.793129	0.245	0.136	3.76e-05
Gbp9	2.4e-09	-0.965359	0.133	0.224	3.89e-05
Txnip	2.49e-09	0.443898	0.833	0.77	4.04e-05
Gbp2	2.68e-09	-0.728457	0.15	0.251	4.34e-05
Pnisr	2.72e-09	0.557695	0.391	0.272	4.41e-05
Cd226	2.75e-09	-0.923276	0.159	0.251	4.46e-05
Ccnd3	3.36e-09	-0.699222	0.35	0.453	5.45e-05
Rabgap1l	3.63e-09	0.504007	0.558	0.448	5.89e-05
Irgm1	3.82e-09	-0.603508	0.198	0.308	6.19e-05
Slc25a3	4.21e-09	0.672816	0.398	0.283	6.83e-05
Fus	4.37e-09	0.494549	0.484	0.378	7.08e-05
Lemd2	4.47e-09	0.877733	0.239	0.138	7.25e-05
H2-T24	4.54e-09	-1.11741	0.104	0.188	7.35e-05
Snapc5	4.59e-09	-0.733914	0.173	0.274	7.44e-05
Rab11b	4.61e-09	0.896759	0.215	0.118	7.48e-05
Ypel3	4.82e-09	0.452046	0.611	0.509	7.81e-05
Map4k2	5.13e-09	0.6279	0.383	0.27	8.31e-05
Prkar1a	5.23e-09	0.474044	0.601	0.493	8.48e-05
Nans	5.39e-09	-0.858123	0.134	0.224	8.74e-05
Jun	5.85e-09	1.34096	0.285	0.186	9.49e-05
Parp9	5.89e-09	-0.962414	0.109	0.193	9.55e-05
Dtx3l	5.97e-09	-0.812064	0.2	0.301	9.68e-05
Sra1	7.1e-09	-0.714984	0.184	0.285	0.00011505
Vim	7.76e-09	-0.28235	0.781	0.864	0.00012585
Emc3	7.87e-09	-1.06222	0.085	0.161	0.00012749
Grap	8.74e-09	0.520939	0.55	0.45	0.00014172
Rgs2	8.9e-09	0.958526	0.258	0.16	0.00014434
Rapgef6	9.14e-09	-0.507418	0.438	0.547	0.00014821
Pik3r5	9.31e-09	0.861532	0.298	0.194	0.00015098
H3f3a	9.33e-09	0.545687	0.494	0.394	0.00015131
Cnppd1	1.27e-08	0.814445	0.324	0.224	0.00020508
Tecpr1	1.27e-08	0.637997	0.409	0.307	0.00020626
Prelid3b	1.36e-08	-0.908935	0.079	0.154	0.00021985
Rer1	1.44e-08	-0.703695	0.214	0.318	0.00023397
Atp5j2	1.49e-08	-0.563159	0.26	0.373	0.00024079
Stat1	1.51e-08	-0.47418	0.521	0.635	0.00024498
Ccnl2	1.76e-08	0.564237	0.452	0.344	0.00028586
Edf1	1.87e-08	-0.536599	0.333	0.442	0.00030331
Zbp1	1.91e-08	-0.622962	0.303	0.409	0.00030956
Zrsr2	2.12e-08	1.29301	0.135	0.059	0.00034364
Sik1	2.16e-08	1.07242	0.168	0.084	0.00035033
Bud31	2.17e-08	-0.757204	0.191	0.287	0.0003515
Itgb7	2.21e-08	0.36799	0.63	0.545	0.00035887
Smpdl3a	2.58e-08	-0.641836	0.229	0.331	0.00041875
Tcf7	2.69e-08	0.683422	0.365	0.261	0.00043679
Eloc	3.13e-08	-1.25755	0.054	0.114	0.00050782
Szrd1	3.67e-08	-0.515887	0.249	0.356	0.00059466
Iqgap1	3.84e-08	0.40203	0.657	0.567	0.0006232
Chil3	3.85e-08	-0.738794	0.145	0.238	0.00062355
S100a6	3.86e-08	-0.466216	0.408	0.516	0.00062524
Atp2a3	3.93e-08	0.572543	0.458	0.362	0.00063757
Ndufs8	3.99e-08	-0.584569	0.19	0.293	0.00064611
Arl2bp	4.13e-08	0.958708	0.258	0.168	0.00067012
Cdk6	4.34e-08	-0.643599	0.135	0.223	0.00070344
Rab3gap1	4.73e-08	0.867983	0.207	0.118	0.00076714
Akna	4.98e-08	-0.406145	0.51	0.622	0.00080794
Pycard	5.61e-08	-0.614128	0.299	0.407	0.00091013
Plekhn1	6e-08	1.16468	0.142	0.067	0.00097308
Eif3b	6.02e-08	0.919891	0.223	0.133	0.00097547
Psme1	6.18e-08	-0.354926	0.591	0.692	0.00100213
Zkscan3	6.24e-08	1.37014	0.124	0.054	0.00101092
Lyz2	6.31e-08	0.5354	0.419	0.316	0.00102232
Tcf25	6.4e-08	0.611494	0.404	0.308	0.00103715
Cd28	6.4e-08	0.526064	0.544	0.466	0.00103799
Gimap7	6.5e-08	-0.522501	0.449	0.547	0.00105325
Vti1a	6.5e-08	0.781461	0.24	0.148	0.00105345
Tmed9	7.34e-08	-0.462952	0.309	0.423	0.00119061
Retreg2	7.87e-08	0.925139	0.23	0.14	0.00127591
Adcy7	7.92e-08	0.536869	0.516	0.42	0.00128435
Psma7	8e-08	-0.804757	0.106	0.184	0.00129746
Lta	8.05e-08	-1.1816	0.122	0.199	0.00130478
Elk3	8.46e-08	-0.620314	0.211	0.308	0.00137063
Pcbp1	8.66e-08	-0.584211	0.322	0.42	0.00140392
Clic1	9.44e-08	-0.453726	0.385	0.497	0.00153017
Psmb8	9.53e-08	-0.336822	0.7	0.773	0.00154476
Pim3	9.91e-08	1.57106	0.119	0.051	0.00160596
Sun2	1e-07	0.509687	0.506	0.403	0.00162276
Samd9l	1.12e-07	-0.853661	0.168	0.256	0.00181973
Myd88	1.25e-07	-0.695402	0.145	0.23	0.00203338
Tmem243	1.28e-07	-0.778853	0.097	0.173	0.00206749
Oas3	1.28e-07	-1.17406	0.056	0.115	0.00208158
Pear1	1.32e-07	0.82275	0.225	0.135	0.00214567
Ndufb10	1.35e-07	-0.493	0.314	0.417	0.00219161
Zfp622	1.36e-07	0.907463	0.23	0.144	0.00219666
Itpr2	1.37e-07	0.491933	0.398	0.29	0.00221764
Ndufa10	1.41e-07	-0.601854	0.241	0.339	0.00228158
Caprin1	1.44e-07	-0.677322	0.157	0.243	0.00234042
Srsf3	1.52e-07	-0.864672	0.182	0.272	0.00246439
Rnf114	1.53e-07	-0.547436	0.304	0.4	0.00247698
Ctsw	1.54e-07	-0.424619	0.414	0.516	0.00250209
Dap	1.61e-07	-0.741164	0.146	0.23	0.00260225
Srrm2	1.92e-07	0.397212	0.601	0.508	0.00311951
Tapbp	1.95e-07	0.398459	0.659	0.577	0.00315475
Rnf125	1.96e-07	0.636063	0.371	0.278	0.00316947
Ubald2	1.99e-07	0.739096	0.351	0.257	0.00323282
Foxo3	2.06e-07	1.08252	0.179	0.101	0.0033443
Epc1	2.08e-07	0.531706	0.381	0.28	0.00336366
Acss1	2.11e-07	1.38859	0.102	0.039	0.00341468
Snx5	2.13e-07	-0.798721	0.103	0.176	0.00345129
Maz	2.3e-07	0.443839	0.573	0.484	0.00372912
Lax1	2.37e-07	-0.604886	0.223	0.318	0.00384639
Thrap3	2.59e-07	0.754297	0.227	0.139	0.00420586
Hist1h1e	2.62e-07	0.542716	0.452	0.358	0.00425133
Slc12a6	2.7e-07	0.866915	0.192	0.11	0.00438286
Fam169b	2.83e-07	0.874837	0.24	0.155	0.00458079
Cdk11b	2.95e-07	0.70954	0.304	0.214	0.00477969
N4bp1	3.08e-07	-0.640189	0.219	0.311	0.00499609
Akap8	3.1e-07	0.460022	0.428	0.329	0.00502487
Smad7	3.14e-07	0.720613	0.276	0.188	0.00509113
Mgat2	3.17e-07	-0.768349	0.155	0.238	0.00513208
Gmfg	3.19e-07	-0.511116	0.376	0.469	0.00516823
Egr1	3.2e-07	-0.670916	0.158	0.244	0.00518231
Pomp	3.23e-07	-0.685028	0.195	0.283	0.00523298
Skap1	3.29e-07	0.447154	0.565	0.491	0.00533247
Kat6a	3.38e-07	0.733049	0.286	0.197	0.00548304
Neurl3	3.44e-07	1.11106	0.237	0.157	0.00557607
Nipbl	3.53e-07	-0.483483	0.303	0.395	0.00571647
Cpd	3.62e-07	-0.907022	0.096	0.165	0.00586289
Cyth4	3.65e-07	-0.484715	0.401	0.495	0.00592425
Cant1	4.08e-07	0.714669	0.249	0.161	0.00661562
Clcf1	4.27e-07	0.930612	0.162	0.087	0.00692877
Tor4a	4.32e-07	-0.594489	0.199	0.289	0.00700022
Atf4	4.33e-07	1.02677	0.169	0.093	0.00701125
Tspan32	4.39e-07	0.57908	0.331	0.231	0.00712144
Nadk	4.44e-07	-0.718022	0.167	0.251	0.00718992
Ppp4r3b	4.95e-07	-0.490878	0.312	0.417	0.00802982
Cmah	5.09e-07	1.46969	0.109	0.047	0.008251
Tap1	5.42e-07	0.411409	0.615	0.549	0.00878073
Fam120a	5.68e-07	-0.725669	0.14	0.22	0.00921431
Lpxn	5.73e-07	-0.652503	0.185	0.272	0.00928229
Rptor	5.87e-07	1.03307	0.165	0.091	0.00951634
Stat3	5.88e-07	-0.446148	0.403	0.499	0.00953398
Tpst2	6.06e-07	-0.423394	0.35	0.455	0.0098215
Lrp10	6.28e-07	0.459829	0.573	0.503	0.0101788
Ppp1r12c	6.57e-07	0.573782	0.329	0.243	0.0106543
Srgn	6.66e-07	0.239842	0.907	0.837	0.0108009
Ube2d3	6.74e-07	-0.60794	0.152	0.236	0.0109184
Ddx23	6.85e-07	0.523736	0.377	0.287	0.0111055
Ywhaq	7.12e-07	-0.708735	0.122	0.197	0.0115363
Fam173a	7.24e-07	0.836484	0.253	0.168	0.0117404
Sqstm1	7.52e-07	0.709036	0.273	0.19	0.0121875
Naa20	7.75e-07	-0.78784	0.126	0.201	0.0125634
Cdc14a	7.95e-07	-0.936196	0.082	0.147	0.0128894
Capza2	8.39e-07	-0.596201	0.124	0.202	0.0136067
Atp5o	8.54e-07	-0.685262	0.256	0.337	0.0138496
Psma5	8.6e-07	-0.558473	0.14	0.224	0.0139355
Baz2a	8.73e-07	0.709744	0.287	0.199	0.0141446
Creb1	8.96e-07	-0.477209	0.237	0.335	0.0145293
Fbxl12	9.17e-07	0.942602	0.188	0.112	0.0148701
Rnf213	9.63e-07	-0.838845	0.211	0.291	0.015611
Unc119	9.93e-07	-0.941928	0.1	0.167	0.0160898
Cited2	1e-06	0.782212	0.309	0.224	0.0162351
Psma4	1.03e-06	-0.503933	0.293	0.39	0.0166519
Pnn	1.04e-06	0.639299	0.281	0.193	0.016782
B4galt5	1.09e-06	-0.65243	0.153	0.234	0.0177314
Chrac1	1.1e-06	-0.815286	0.097	0.164	0.0178734
Nudt3	1.11e-06	0.663949	0.321	0.238	0.0179214
Akr1b3	1.14e-06	-0.415229	0.271	0.37	0.0185462
Lgals9	1.15e-06	-0.544132	0.214	0.304	0.0185628
Safb2	1.17e-06	0.650392	0.273	0.184	0.0189364
Bbc3	1.17e-06	1.55922	0.106	0.047	0.0189696
Arsb	1.22e-06	-0.82798	0.093	0.16	0.0198096
Eef1akmt1	1.23e-06	-1.09412	0.05	0.102	0.0199934
Aldoa	1.26e-06	-0.44532	0.308	0.407	0.0203891
Hopx	1.32e-06	-0.499573	0.35	0.438	0.0214672
Aph1a	1.37e-06	0.832918	0.241	0.161	0.0222851
Nfkb2	1.38e-06	-0.333067	0.294	0.396	0.0223293
Gdi1	1.41e-06	0.493777	0.407	0.312	0.0229154
Shisa5	1.47e-06	-0.178805	0.97	0.971	0.023825
Arpp19	1.52e-06	-0.807103	0.11	0.177	0.0246183
Pld3	1.53e-06	-0.494887	0.318	0.416	0.024842
Hectd1	1.54e-06	0.575685	0.291	0.203	0.0249296
Ncoa6	1.55e-06	-0.704915	0.12	0.192	0.0250887
Plcb2	1.56e-06	0.769402	0.206	0.126	0.0252563
Hp1bp3	1.63e-06	0.466311	0.479	0.392	0.0264417
Smarcc1	1.65e-06	-0.725718	0.116	0.189	0.0268036
Cdk2ap2	1.66e-06	-0.517354	0.312	0.404	0.0269022
Casp3	1.68e-06	-0.712737	0.165	0.244	0.0271844
Cops6	1.76e-06	-0.594416	0.195	0.281	0.0285644
Wbp2	1.78e-06	-0.65051	0.166	0.247	0.0287849
B4galnt4	1.82e-06	-0.759173	0.141	0.215	0.0295316
Casc3	1.84e-06	0.71194	0.262	0.177	0.0298457
Tmem173	1.92e-06	-0.58858	0.239	0.328	0.0311176
Nup153	2.07e-06	-0.485584	0.279	0.373	0.0335422
Dtx3	2.1e-06	0.817901	0.179	0.104	0.0340934
Atp5b	2.11e-06	0.619928	0.275	0.19	0.0342348
Mif4gd	2.15e-06	-0.600911	0.232	0.318	0.0347851
Lgals3	2.16e-06	-0.554056	0.309	0.396	0.0350249
Entpd1	2.27e-06	-0.731313	0.138	0.213	0.0368366
Herpud2	2.3e-06	-0.711715	0.089	0.154	0.0373464
Elovl1	2.31e-06	-0.706291	0.1	0.167	0.0373953
Pnrc2	2.41e-06	-0.533883	0.24	0.328	0.0390715
Dnmt3a	2.48e-06	-0.908293	0.096	0.16	0.0401425
Dok2	2.5e-06	0.603813	0.356	0.272	0.0404683
Sdha	2.53e-06	0.503839	0.393	0.307	0.0409731
Atrx	2.62e-06	-0.460293	0.267	0.361	0.0424818
Mark3	2.65e-06	-0.709316	0.139	0.211	0.0430217
Gigyf1	2.77e-06	0.836658	0.214	0.139	0.0449379
Klhl6	2.84e-06	0.765312	0.272	0.192	0.0459694
Oard1	2.84e-06	0.737067	0.217	0.138	0.045975
Txn2	2.84e-06	-0.548584	0.176	0.26	0.0460284
Atf1	2.9e-06	0.717621	0.317	0.234	0.0470786
Nol7	2.93e-06	-0.492938	0.305	0.394	0.0474227
Tspan13	2.98e-06	0.739257	0.286	0.209	0.048279
Wdr46	3.01e-06	0.87673	0.199	0.126	0.0487865
Traf3ip3	3.05e-06	0.444108	0.461	0.383	0.0494516
Gna13	3.08e-06	0.393793	0.576	0.509	0.0499667

## Sheet: eTable 2
Extended data table 1: List of differentially expressed genes with an adjusted P value < 0.05 from the Her2+IAV vs WT+IAV comparison at 15dpi in CD4+Il7r+ T cells
Wilcoxon Rank Sum test was run to test for differential expression between the sample groups
Adjusted P value was calculated based on bonferroni correction using all genes tested
avg_log2FC refers to the log2 fold-change of the average expression between the two groups. Positive values indicate that the gene is more highly expressed in the Her2+IAV+15dpi sample
pct.1 refers to the percentage of cells where the gene is detected in Her2+IAV+15dpi sample
pct.2 refers to the percentage of cells where the gene is detected in WT+IAV+15dpi sample
Gene	pvalue	avg_log2FC	pct.1	pct.2	adjusted p
mt-Co3	2.46875e-106	-2.53525	0.298	0.778	4.00184e-102
Col1a1	5.41347e-86	-3.68774	0.036	0.31	8.77524e-82
mt-Nd1	9.34229e-83	-2.70139	0.213	0.62	1.51438e-78
mt-Co2	3.57563e-73	-1.89005	0.55	0.836	5.79609e-69
Mgp	6.31853e-71	-2.96322	0.066	0.359	1.02423e-66
mt-Atp6	2.66843e-70	-2.3437	0.312	0.681	4.32552e-66
mt-Atp8	4.38243e-55	-1.53581	0.524	0.793	7.10392e-51
Tnfaip3	4.28021e-54	2.49105	0.625	0.143	6.93823e-50
mt-Cytb	5.82965e-47	-2.0273	0.23	0.532	9.44987e-43
mt-Co1	2.65867e-46	-1.65977	0.449	0.717	4.30971e-42
Vps37b	2.30852e-44	1.64277	0.73	0.35	3.7421e-40
Gadd45b	2.8642e-44	-2.81616	0.053	0.261	4.64287e-40
Dusp10	6.41562e-44	2.05592	0.639	0.234	1.03997e-39
Fn1	1.3011e-42	-3.00915	0.041	0.225	2.10909e-38
Klf6	2.12741e-39	1.51968	0.722	0.34	3.44853e-35
Tmsb4x	1.61911e-37	-0.443663	0.999	0.991	2.62457e-33
Jund	2.23068e-36	0.935377	0.921	0.714	3.61593e-32
Arhgef1	1.05114e-34	0.771974	0.953	0.775	1.7039e-30
Pdcd4	1.67453e-33	0.963763	0.858	0.565	2.71442e-29
Ly6a	3.97047e-30	-2.31535	0.11	0.319	6.43613e-26
Col1a2	4.56261e-30	-2.687	0.028	0.158	7.396e-26
mt-Nd4	9.78774e-30	-2.26678	0.079	0.264	1.58659e-25
Dusp1	2.60394e-29	1.8055	0.522	0.176	4.22098e-25
Crlf3	4.41206e-28	0.998498	0.769	0.462	7.15194e-24
Tagap	4.80474e-28	1.13675	0.69	0.34	7.78849e-24
Ets1	3.14079e-27	0.557592	0.984	0.909	5.09122e-23
Dynll1	1.01701e-26	-2.11753	0.12	0.316	1.64857e-22
Eef2	3.23506e-26	0.917491	0.78	0.492	5.24404e-22
Socs3	1.63824e-25	-1.91583	0.168	0.383	2.65558e-21
Srgn	5.09643e-25	0.924806	0.791	0.523	8.26131e-21
mt-Nd3	1.70087e-24	-2.61564	0.046	0.182	2.75711e-20
Cd52	1.2314e-23	-0.784387	0.829	0.872	1.9961e-19
Klf2	4.13496e-23	0.592685	0.968	0.857	6.70278e-19
Tsc22d3	7.47899e-23	0.940106	0.675	0.328	1.21234e-18
Gimap3	1.0653e-22	0.868457	0.762	0.483	1.72686e-18
Sparc	2.99504e-22	-2.19502	0.065	0.213	4.85497e-18
Cirbp	4.37446e-22	1.15738	0.536	0.228	7.09099e-18
Jun	1.00483e-21	1.19209	0.588	0.286	1.62883e-17
Dusp5	1.33243e-21	1.99856	0.382	0.109	2.15988e-17
Myh9	2.82738e-21	1.14257	0.587	0.292	4.58319e-17
mt-Nd4l	1.76151e-20	-1.74859	0.163	0.343	2.8554e-16
Hopx	1.93927e-20	-2.26138	0.078	0.228	3.14355e-16
Ppp1r15a	2.03695e-19	1.10923	0.521	0.219	3.3019e-15
Msn	4.04013e-19	0.602506	0.905	0.705	6.54905e-15
Pim1	4.9628e-18	0.956167	0.654	0.41	8.0447e-14
Brd2	6.40078e-18	-1.19247	0.3	0.48	1.03757e-13
Anp32a	7.42658e-18	0.806609	0.727	0.447	1.20385e-13
Tpt1	2.1453e-17	-0.373188	0.996	0.979	3.47753e-13
Junb	3.77338e-17	0.924177	0.771	0.565	6.11666e-13
Il2rb	4.05863e-17	-1.88465	0.113	0.264	6.57904e-13
Srsf5	4.55786e-17	0.766207	0.678	0.41	7.38829e-13
Bgn	4.57866e-17	-1.94887	0.066	0.191	7.422e-13
B2m	5.70949e-16	-0.718157	0.74	0.781	9.25509e-12
Nfkbia	7.15145e-16	0.917271	0.674	0.45	1.15925e-11
S1pr4	7.33703e-16	0.728488	0.733	0.511	1.18933e-11
Hnrnpul1	1.31475e-15	0.760637	0.679	0.426	2.13122e-11
Bcl11b	1.54923e-15	0.77093	0.636	0.371	2.51131e-11
Ly6e	1.73888e-15	-0.798285	0.642	0.748	2.81872e-11
Trac	1.87811e-15	-0.602264	0.858	0.891	3.04442e-11
Dgka	5.40011e-15	0.450316	0.953	0.836	8.75358e-11
Isg15	5.40813e-15	-2.32059	0.027	0.109	8.76657e-11
Mcl1	6.86056e-15	0.667821	0.806	0.617	1.1121e-10
Lef1	7.75616e-15	0.443695	0.871	0.657	1.25727e-10
Id3	7.87683e-15	-1.99041	0.061	0.173	1.27683e-10
Ybx3	9.63113e-15	-2.52351	0.027	0.109	1.56121e-10
Igkc	2.6826e-14	-1.484	0.444	0.571	4.34849e-10
S100a4	2.78877e-14	-2.79952	0.024	0.1	4.52059e-10
mt-Nd5	3.27755e-14	-1.44238	0.201	0.35	5.31291e-10
S100a11	3.52798e-14	-1.14763	0.264	0.422	5.71885e-10
Col3a1	5.16667e-14	-2.02434	0.039	0.131	8.37518e-10
Atp5b	7.44304e-14	1.29767	0.332	0.125	1.20652e-09
Sgk1	9.99743e-14	-1.2501	0.249	0.404	1.62058e-09
Npc2	1.17921e-13	0.471303	0.876	0.711	1.9115e-09
Ctsw	2.13248e-13	-1.65566	0.147	0.286	3.45675e-09
Med13l	2.48153e-13	1.43717	0.317	0.119	4.02255e-09
Rab3ip	2.68381e-13	1.06005	0.397	0.173	4.35046e-09
Rsrp1	3.05936e-13	0.643374	0.605	0.331	4.95921e-09
Peli1	3.15614e-13	0.61416	0.73	0.511	5.11611e-09
Frmd8	3.402e-13	0.967338	0.437	0.21	5.51465e-09
H3f3a	3.48736e-13	0.752946	0.554	0.313	5.65302e-09
Top2b	4.46973e-13	1.04318	0.433	0.21	7.24543e-09
Clec2d	4.73865e-13	-0.916666	0.456	0.596	7.68136e-09
Sik1	4.90138e-13	2.13474	0.234	0.058	7.94514e-09
Zc3hav1	5.9703e-13	0.795425	0.617	0.404	9.67786e-09
Itgb1	6.6478e-13	-1.44385	0.098	0.222	1.07761e-08
H2-K1	6.69475e-13	0.524808	0.798	0.614	1.08522e-08
Phf20l1	9.71193e-13	0.824514	0.493	0.252	1.5743e-08
Ccr7	1.00597e-12	0.440996	0.808	0.599	1.63068e-08
Cnbp	1.1408e-12	1.15772	0.357	0.149	1.84923e-08
Srsf3	1.15871e-12	-1.49504	0.156	0.292	1.87826e-08
Tubb4b	1.41624e-12	-1.25114	0.251	0.389	2.29573e-08
Kif21b	1.41913e-12	0.527464	0.75	0.532	2.30041e-08
Egr1	1.55841e-12	-1.83176	0.072	0.179	2.52618e-08
Fam107b	1.95694e-12	0.631344	0.605	0.368	3.1722e-08
Ablim1	2.9609e-12	-0.631159	0.65	0.733	4.79961e-08
Txnip	4.26053e-12	0.535826	0.93	0.845	6.90632e-08
Arhgef18	4.3294e-12	0.519925	0.803	0.611	7.01796e-08
Zfp36l2	4.87954e-12	0.581978	0.862	0.708	7.90974e-08
Pnrc1	5.31288e-12	0.53117	0.756	0.541	8.61218e-08
Map4k2	7.00344e-12	0.759666	0.527	0.295	1.13526e-07
Gimap1	8.14009e-12	0.81095	0.553	0.337	1.31951e-07
Cxcr4	1.11802e-11	0.939919	0.441	0.231	1.81232e-07
Skap1	1.39188e-11	0.624002	0.627	0.404	2.25623e-07
Fau	1.54374e-11	0.339094	0.964	0.848	2.5024e-07
Rtp4	2.0735e-11	-2.15712	0.033	0.109	3.36114e-07
Evl	2.25614e-11	0.477951	0.808	0.635	3.65721e-07
Il6ra	3.28583e-11	0.742789	0.473	0.252	5.32633e-07
Hp1bp3	3.31495e-11	0.805736	0.48	0.277	5.37353e-07
Leng8	3.37984e-11	0.615391	0.495	0.271	5.47871e-07
Eif4b	3.74997e-11	0.891274	0.467	0.267	6.07871e-07
Utrn	3.91049e-11	0.902811	0.41	0.21	6.3389e-07
Bin2	6.82591e-11	0.581608	0.762	0.568	1.10648e-06
Stk4	7.63116e-11	0.895457	0.356	0.164	1.23701e-06
Tcf7	1.25403e-10	0.452416	0.8	0.584	2.03279e-06
Elmo1	1.43829e-10	-0.75144	0.488	0.59	2.33147e-06
Kdm6b	1.91095e-10	0.868052	0.392	0.191	3.09766e-06
H2-D1	2.13184e-10	0.527117	0.714	0.489	3.4557e-06
Ccl5	2.2137e-10	-2.62891	0.128	0.243	3.5884e-06
Cxcr3	3.1825e-10	-1.879	0.033	0.103	5.15884e-06
Cyth1	3.45025e-10	0.541411	0.544	0.313	5.59285e-06
Akr1a1	4.15088e-10	0.775099	0.488	0.289	6.72857e-06
Znrf2	4.1553e-10	0.585431	0.664	0.483	6.73574e-06
Crebzf	4.19757e-10	1.19546	0.277	0.109	6.80426e-06
Jmy	4.91984e-10	1.27991	0.262	0.1	7.97506e-06
Ifitm10	5.03934e-10	-1.87271	0.057	0.143	8.16877e-06
Tspan13	5.07385e-10	0.792009	0.383	0.198	8.22471e-06
Thada	5.17121e-10	-0.903099	0.349	0.468	8.38253e-06
Tecpr1	5.50947e-10	0.692809	0.479	0.28	8.93084e-06
Grk6	5.57566e-10	0.618868	0.578	0.386	9.03815e-06
Cd40lg	7.80658e-10	1.22485	0.24	0.085	1.26545e-05
Fxyd5	8.69326e-10	-0.565859	0.684	0.733	1.40918e-05
Tspan32	8.74813e-10	0.66011	0.428	0.228	1.41807e-05
Cdc42se1	8.8045e-10	0.682301	0.592	0.401	1.42721e-05
Il4ra	1.49369e-09	0.763336	0.421	0.228	2.42128e-05
Arfgap2	1.7705e-09	1.40162	0.208	0.067	2.86998e-05
Gdi1	2.27577e-09	0.969689	0.395	0.219	3.68903e-05
Itpkb	2.43617e-09	0.767663	0.441	0.249	3.94904e-05
Pcif1	3.29113e-09	1.1607	0.281	0.122	5.33493e-05
Sptbn1	3.67603e-09	0.606687	0.516	0.316	5.95885e-05
Cd247	3.87107e-09	0.457303	0.771	0.587	6.275e-05
Rab3gap1	3.95191e-09	1.29304	0.219	0.076	6.40605e-05
Zc3h12a	3.98214e-09	1.10118	0.269	0.112	6.45506e-05
Itgb7	4.72592e-09	0.465049	0.717	0.514	7.66072e-05
Tdrp	6.0046e-09	0.571508	0.359	0.176	9.73346e-05
Tcf25	6.29537e-09	0.753161	0.389	0.21	0.000102048
Ctla2a	6.29824e-09	-1.7198	0.038	0.106	0.000102095
Fam169b	6.62104e-09	0.802772	0.375	0.195	0.000107327
Frat2	6.98645e-09	1.55203	0.158	0.036	0.00011325
Rack1	7.75488e-09	0.255763	0.917	0.79	0.000125707
Traf3ip3	7.81492e-09	0.46531	0.592	0.386	0.00012668
Ahnak	7.85083e-09	-1.44647	0.188	0.304	0.000127262
Cmtm6	9.13048e-09	0.666944	0.435	0.246	0.000148005
Rnf213	9.82669e-09	-1.29193	0.17	0.283	0.000159291
Dgkd	9.94547e-09	0.651614	0.451	0.261	0.000161216
Arid5a	1.0534e-08	1.19973	0.241	0.097	0.000170756
P2ry10	1.38147e-08	0.931216	0.264	0.112	0.000223936
Eef1b2	1.463e-08	0.390472	0.793	0.617	0.000237152
Raf1	1.53956e-08	0.950403	0.295	0.14	0.000249563
Ddx3x	1.54859e-08	0.611847	0.433	0.249	0.000251026
Mtss1	1.92045e-08	1.28995	0.204	0.07	0.000311305
Cd4	2.30592e-08	0.463408	0.578	0.365	0.000373789
Stat5b	2.72494e-08	0.739848	0.404	0.228	0.000441712
Slc25a3	2.82171e-08	0.615491	0.392	0.216	0.0004574
Fmr1	3.0968e-08	1.09957	0.18	0.055	0.000501991
Trat1	3.10611e-08	1.34573	0.192	0.064	0.000503501
Tax1bp1	3.17466e-08	0.499781	0.391	0.213	0.000514612
Gdpd3	3.37903e-08	0.571714	0.587	0.416	0.00054774
Ccdc9	3.77118e-08	1.06204	0.255	0.116	0.000611308
Ddit4	4.2321e-08	-1.26389	0.082	0.17	0.000686023
Syf2	4.3204e-08	0.44685	0.525	0.331	0.000700336
Per1	4.41197e-08	0.747845	0.368	0.198	0.000715181
Nr4a1	4.76033e-08	1.43059	0.198	0.073	0.00077165
Tcp11l2	4.79777e-08	0.675365	0.449	0.28	0.000777719
Hexim1	4.88515e-08	-1.05805	0.314	0.422	0.000791883
Itga6	5.66638e-08	0.503149	0.502	0.313	0.00091852
Otud1	5.95186e-08	1.02543	0.247	0.106	0.000964796
Rflnb	6.05471e-08	0.669162	0.348	0.182	0.000981468
Tmem134	6.27783e-08	0.746233	0.321	0.161	0.00101764
Rac2	6.9682e-08	0.270206	0.967	0.869	0.00112955
Sec11a	7.24827e-08	0.423756	0.55	0.353	0.00117494
Orai2	7.37991e-08	0.781606	0.364	0.204	0.00119628
Vim	7.86258e-08	-0.669168	0.532	0.605	0.00127452
Saraf	8.52698e-08	0.450423	0.723	0.547	0.00138222
Fam78a	8.85583e-08	0.45509	0.695	0.526	0.00143553
Apoe	9.55157e-08	1.5176	0.15	0.04	0.00154831
Bag6	9.59716e-08	1.02948	0.238	0.103	0.0015557
Cox6b1	9.90228e-08	1.16961	0.239	0.109	0.00160516
Stk38	9.97832e-08	0.40659	0.635	0.438	0.00161749
mt-Nd2	1.02317e-07	-1.25911	0.148	0.246	0.00165856
Cdkn1b	1.09658e-07	0.428794	0.625	0.426	0.00177756
Atp2a3	1.10984e-07	0.66236	0.446	0.28	0.00179905
Irs2	1.13152e-07	1.37752	0.201	0.079	0.0018342
Ttyh3	1.19267e-07	0.845548	0.34	0.185	0.00193332
Bcl3	1.29232e-07	-1.49121	0.113	0.207	0.00209484
Spp1	1.41856e-07	-1.40434	0.087	0.17	0.00229948
Sertad1	1.46605e-07	-1.41399	0.117	0.21	0.00237647
Nop53	1.57343e-07	0.525032	0.564	0.389	0.00255053
Ifngr2	1.57458e-07	1.09775	0.199	0.076	0.00255239
B4galt5	1.59912e-07	-1.33112	0.081	0.164	0.00259218
Arhgap26	2.02006e-07	-1.46951	0.05	0.119	0.00327452
Sirt7	2.13196e-07	0.766443	0.306	0.161	0.0034559
Pnisr	2.4038e-07	0.668536	0.39	0.231	0.00389656
2024-09-01	2.42597e-07	0.349375	0.822	0.663	0.0039325
Chd3	2.64129e-07	0.604069	0.437	0.274	0.00428152
Lgals1	2.71772e-07	-1.79983	0.039	0.1	0.00440543
Plcb2	2.74622e-07	0.753669	0.267	0.128	0.00445162
Vps54	3.14306e-07	-1.05454	0.186	0.286	0.0050949
Klhl9	3.20359e-07	0.806352	0.274	0.134	0.00519301
Retreg2	3.29092e-07	1.23945	0.181	0.067	0.00533458
F2r	3.42977e-07	-1.18821	0.114	0.204	0.00555966
Hnrnpa1	3.66341e-07	0.73038	0.39	0.24	0.00593839
Sfr1	3.93046e-07	-0.966729	0.194	0.298	0.00637127
Pik3cd	4.3385e-07	0.359458	0.72	0.547	0.0070327
Snx20	4.64753e-07	1.07366	0.207	0.085	0.00753364
Txk	5.19411e-07	0.498963	0.445	0.271	0.00841964
Fam102a	5.26499e-07	0.564961	0.456	0.295	0.00853456
Bcl2l11	5.33764e-07	0.897847	0.233	0.106	0.00865232
Arglu1	5.40371e-07	0.595026	0.407	0.252	0.00875942
Rabac1	5.689e-07	0.440161	0.655	0.48	0.00922186
Dhx38	5.75787e-07	0.984338	0.207	0.085	0.0093335
Sephs2	6.55215e-07	-1.13664	0.11	0.198	0.010621
Plp2	6.97932e-07	-1.22069	0.137	0.228	0.0113135
Cpt1a	7.06471e-07	1.37108	0.158	0.055	0.0114519
Lat	7.50862e-07	0.372163	0.838	0.72	0.0121715
Esyt2	7.6879e-07	0.530927	0.522	0.343	0.0124621
Acss1	8.60031e-07	1.3212	0.16	0.055	0.0139411
Carns1	8.97686e-07	1.53301	0.14	0.043	0.0145515
Arhgap45	9.08438e-07	0.262322	0.882	0.787	0.0147258
Dpf2	9.32384e-07	1.20019	0.201	0.088	0.0151139
Adcy7	9.40397e-07	0.576428	0.395	0.24	0.0152438
Unc45a	9.74353e-07	0.972104	0.194	0.079	0.0157943
Tapbp	9.8158e-07	0.514155	0.594	0.413	0.0159114
Spn	9.96272e-07	0.321112	0.766	0.599	0.0161496
Samd9l	1.02994e-06	-1.19159	0.162	0.255	0.0166953
Cst7	1.06008e-06	-1.31402	0.078	0.155	0.0171839
Add1	1.08721e-06	0.513608	0.531	0.374	0.0176237
Dhx40	1.09012e-06	0.768061	0.285	0.146	0.0176709
Naca	1.14083e-06	-0.787956	0.421	0.492	0.0184929
Chchd2	1.23189e-06	0.586513	0.517	0.356	0.019969
Mbd2	1.2885e-06	0.420306	0.67	0.505	0.0208866
Rnf187	1.31579e-06	0.477818	0.556	0.389	0.021329
Tmc6	1.38575e-06	0.753822	0.323	0.185	0.022463
Sdha	1.54935e-06	0.502829	0.43	0.267	0.0251149
Man2c1	1.56384e-06	1.26439	0.164	0.061	0.0253499
Smad7	1.65357e-06	0.461656	0.422	0.258	0.0268043
Atp1b1	1.65807e-06	0.596927	0.425	0.264	0.0268773
Actn1	1.67574e-06	0.496155	0.416	0.255	0.0271638
Slc25a36	1.83905e-06	1.20547	0.157	0.055	0.029811
Itpr2	1.85576e-06	0.51384	0.377	0.219	0.0300818
Lsm4	1.89602e-06	0.690718	0.318	0.176	0.0307346
Adgre5	2.19301e-06	0.341881	0.599	0.429	0.0355487
Hcls1	2.22044e-06	0.423522	0.511	0.337	0.0359933
Rab11b	2.23941e-06	0.807799	0.219	0.1	0.0363008
Slco3a1	2.27462e-06	0.66805	0.291	0.155	0.0368716
Fos	2.27517e-06	0.954601	0.354	0.225	0.0368805
Selenop	2.27661e-06	0.371707	0.553	0.377	0.0369039
Atp1b3	2.31289e-06	0.280376	0.814	0.669	0.037492
Tgfbr3	2.31306e-06	0.575115	0.297	0.161	0.0374947
Emb	2.37575e-06	0.350248	0.673	0.489	0.0385109
Dip2b	2.38608e-06	1.09998	0.189	0.082	0.0386784
Ptp4a2	2.39881e-06	0.94579	0.256	0.137	0.0388848
Hspa5	2.43026e-06	1.05293	0.196	0.085	0.0393945
Nkg7	2.43513e-06	-1.17403	0.197	0.289	0.0394735
Irgm1	2.5619e-06	-0.910693	0.129	0.219	0.0415283
Mplkip	2.68188e-06	-1.53232	0.047	0.106	0.0434733
Ywhaq	2.70792e-06	-1.24007	0.094	0.17	0.0438954
Icam1	2.72839e-06	-1.38325	0.065	0.134	0.0442273
Klhl6	2.91769e-06	0.393675	0.439	0.28	0.0472958
